# Supplementary material for: Comparative Genomic and Phylogenetic Analysis of the First Usutu Virus Isolate from a Human Patient Presenting with Neurological Symptoms
Source: PLoS One. 2013 May 31;8(5):e64761. doi: 10.1371/journal.pone.0064761 (PMC3669420; doi:10.1371/journal.pone.0064761)
Supplement: Table S1 — Comparison of the nucleotide and corresponding amino-acid substitutions between Bologna/09 (human isolate) and African (SAAR-1776 strain) and European (Vienna 2001, Meise H 2002, Budapest 2005, Italia 2009 and Germany 2011) USUV isolates. (DOC) [file pone.0064761.s001.doc]

**Table S1.** Comparison of the nucleotide and corresponding amino-acid substitutions between Bologna/09 (human isolate) and African (SAAR-1776 strain) and European (Vienna 2001, Meise H 2002, Budapest 2005, Italia 2009 and Germany 2011) USUV isolates.

|  | **Codon modification**  **[USUV Bologna/09]aa [USUV Reference Strain]aa** | | | | | | | | | | |
| --- | --- | --- | --- | --- | --- | --- | --- | --- | --- | --- | --- |
|  | **Structural Protein** | | | **NonStructural Protein** | | | | | | | |
|  | **C** | **M** | **E** | **NS1** | **NS2a** | **NS2b** | **NS3** | **NS4a** | **2K** | **NS4b** | **NS5** |
| **Reference**  **Strains** |  |  |  |  |  |  |  |  |  |  |  |
|  |  |  |  |  |  |  |  |  |  |  |  |
| **SAAR-1776**  **(AY453412)** | [GTT]**Val**  [GCC]**Ala120** |  | [ATG]**Met** [GTG]**Val419**  [GGC]**Gly** [AGC]**Ser** 569  **a[AGC]Ser [GGC]Gly595**  [GGC]**Gly** [AGC]**Ser613**  [ACA]**Thr** [CCA]**Pro716**  [AAC]**Asn** [AGC]**Ser790** | **b[GGA]Gly [GAG]Glu830**  [AGG]**Arg** [AAG]**Lys1117** | [AAC]**Asn**  [GAC]**Asp1267**  [TTT]**Phe** [CTC]**Leu1268**  [ACC]**Thr**  [ATT]**Ile1324** |  | **b[GTA]Val [ATA]Ile1602**  [ATC]**Ile** [GTC]**Val1618**  [GCT]**Leu** [GAT]**Met1695**  [AGA]**Arg** [ATA]**Ile2030**  [GAG]**Glu** [CAG]**Gln2032**  [GCT]**Ala** [TCC]**Ser2103** | [CTT]**Leu**  [TTT]**Phe2166** |  | [ATA]**Ile** [ATG]**Met2287**  [AGC]**Ser** [GGC]**Gly2290**  **b[AGC]Ser [AAC]Asn2304** | [AAG]**Lys** [AGG]**Arg2550**  **b** [ATA]**Ile** [ATG]**Met2645**  [ACC]**Thr** [GCC]**Ala2803**  [AGC]**Ser** [GGC]**Gly2849**  **a[GAT]Asp [GAA]Glu3425**  [AAT]**Asn** [GAT]**Asp3427** |
|  |  |  |  |  |  |  |  |  |  |  |  |
|  |  |  |  |  |  |  |  |  |  |  |  |
| **Vienna 2001**  **(AY453411)** |  |  | **a[AGC]Ser [GGC]Gly595** | **b[GGA]Gly [GAA]Glu830**  [GTA]**Val** [GCA]**Ala939** | [TAT]**Tyr** [CAT]**Hys1146**  [ACC]**Thr** [ATC]**Ile1324** |  | **b[GTA]Val [ATA]Ile1602**  [GTT]**Val** [GCT]**Ala1779** |  |  | **b[AGC]Ser [AAC]Asn2304**  [TTG]**Leu** [TTT]**Phe2367** | **b** [ATA]**Ile** [ATG]**Met2645**  **a[GAT]Asp [GAA]Glu3425** |
|  |  |  |  |  |  |  |  |  |  |  |  |
|  |  |  |  |  |  |  |  |  |  |  |  |
| **Meise H 2002**  **(JQ219843)** |  |  | **a[AGC]Ser [GGC]Gly595** | [GTC]**Val** [ATC]**Ile822**  **b[GGA]Gly [GAA]Glu830**  [GTA]**Val** [GCA]**Ala939** | [TAT]**Tyr** [CAT]**Hys1146**  [ACC]**Thr** [ATC]**Ile1324** |  | **b[GTA]Val [ATA]Ile1602** |  |  | **b[AGC]Ser [AAC]Asn2304** | **b**[ATA]**Ile** [ATG]**Met2645**  **a[GAT]Asp [GAA]Glu3425** |
|  |  |  |  |  |  |  |  |  |  |  |  |
|  |  |  |  |  |  |  |  |  |  |  |  |
| **Budapest 2005**  **(EF206350)** |  | [ACT]**Thr**  [ATT]**Ile176** | **a[AGC]Ser [GGC]Gly595** | **b[GGA]Gly [GAA]Glu830**  [GTA]**Val** [GCA]**Ala939** | [TAT]**Tyr** [CAT]**Hys1146** |  | **b[GTA]Val [ATA]Ile1602** |  |  | **b[AGC] Ser [AAC] Asn2304** | **b**[ATA]**Ile** [ATG]**Met2645**  **a[GAT]Asp [GAA]Glu3425** |
|  |  |  |  |  |  |  |  |  |  |  |  |
|  |  |  |  |  |  |  |  |  |  |  |  |
| **Italia 2009**  **(JF266698)** |  | [AAA]**Lys** [AGA]**Arg181** | **a[AGC]Ser [GGC]Gly595** |  |  |  |  |  |  |  | **a[GAT]Asp [GAA]Glu3425** |
|  |  |  |  |  |  |  |  |  |  |  |  |
|  |  |  |  |  |  |  |  |  |  |  |  |
| **Germany 2011**  **(HE599647)** | [AAC]**Asn** [AGC]**Ser11**  [AAA]**Lys** [AGA]**Arg85** |  | **a[AGC]Ser [GGC]Gly595** | **b[GGA]Gly [GAA]Glu830** | [GTC]**Val** [ATC]**Ile1219**  [GCA]**Ala** [GTA]**Val1237**  [ACC]**Thr** [ATC]**Ile1324** |  | **[CTT]Leu [TTT]Phe1549**  **b**[GTA]**Val** [ATA]**Ile1602** |  |  | **b[AGC]Ser [AAC]Asn2304**  [AAG]**Lys** [AGA]**Arg2445** | **b** [ATA]**Ile** [ATG]**Met2645**  **a[GAT]Asp [GAA]Glu3425** |
|  |  |  |  |  |  |  |  |  |  |  |  |

**a** aminoacids substitution of USUV Bologna/09 (human isolates) in comparison to not human USUV reference strains

**b** aminoacids subtitution of USUV italian isolates in comparison to the European and African USUV strains
